# Supplementary material for: Further studies on the photoreactivities of ruthenium–nitrosyl complexes with terpyridyl ligands
Source: Royal Society of Chemistry journal article supplement (doi:10.1039/c9nj02398d), 2019-01-01
Supplement: c9nj02398d1.pdf [file c9nj02398d1.pdf]

## Electronic Supplementary Information

### Further studies on the photoreactivities of ruthenium-nitrosyl complexes with terpyridyl ligands.

Isabelle Sasaki\* <sup>a,b,c</sup>, Silvia Amabilino <sup>a,b</sup>, Sonia Mallet-Ladeira <sup>a,b</sup>, Marine Tasse <sup>a,b</sup>, Alix Sournia-Saquet <sup>a,b</sup>, Pascal Lacroix <sup>a,b</sup>, Isabelle Malfant\* <sup>a,b</sup>.

<sup>a</sup> CNRS; LCC (Laboratoire de Chimie de Coordination), 205 route de Narbonne, 31077 Toulouse, France

<sup>b</sup> Université de Toulouse; UPS, INP, LCC, 31077 Toulouse, France

<sup>c</sup> ISM (Institut des Sciences Moléculaires, UMR 5255), 351, cours de la libération, 33405 Talence Cedex, France

\*corresponding authors: [isabelle.sasaki@u-bordeaux.fr](mailto:isabelle.sasaki@u-bordeaux.fr), [isabelle.malfant@lcc-toulouse.fr](mailto:isabelle.malfant@lcc-toulouse.fr)

**Fig. S1:**  $^1\text{H}$  NMR of the ligand

**Fig. S2 :**  $^{13}\text{C}$  NMR of the ligand

**Fig. S3:**  $^1\text{H}$  NMR of the crude reaction mixture in the synthesis of  $[\mathbf{1}]^+(\text{PF}_6)$

**Fig. S4 :**  $^1\text{H}$  NMR of  $[\mathbf{1t}]^+(\text{PF}_6)$

**Fig. S5 :**  $^{13}\text{C}$  NMR of  $[\mathbf{1t}]^+(\text{PF}_6)$

**Fig. S6 :** ESI mass spectrum of  $[\mathbf{1t}]^+(\text{PF}_6)$

**Fig. S7 :**  $^1\text{H}$  NMR of  $[\mathbf{1c}]^+(\text{PF}_6)$

**Fig. S8 :** ESI mass spectrum of  $[\mathbf{1c}]^+(\text{PF}_6)$

**Fig. S9 :**  $^1\text{H}$  NMR of  $[\mathbf{2t}]^+(\text{PF}_6)$

**Fig. S10 :**  $^{13}\text{C}$  NMR of  $[\mathbf{2t}]^+(\text{PF}_6)$

**Fig. S11 :** HR mass spectrum of  $[\mathbf{2t}]^+(\text{PF}_6)$

**S1:** synthesis of  $[\mathbf{3}]^+(\text{PF}_6)$

**Fig. S12:**  $^1\text{H}$  NMR of complex  $[\mathbf{3t}]^+(\text{PF}_6)$

**Fig. S 13:** Square-wave voltammograms of  $[\mathbf{1t}]^+(\text{PF}_6)$  and  $[\mathbf{1c}]^+(\text{PF}_6)$

**Fig. S14:** CV of  $[\mathbf{2t}]^+(\text{PF}_6)$  before and after irradiation with a Xenon lamp.

**Fig. S 15:** Square-wave voltammogram of  $[\mathbf{2t}]^+(\text{PF}_6)$

**Fig. S16:** CV of the ligand  $\text{NEt}_2\text{Phtpy}$

**Fig. S17:** Evolution of the electronic spectrum of  $[\mathbf{2t}]^+(\text{PF}_6)$  during irradiation at 365 nm.

**Fig. S18:** Absorption spectra of  $[\mathbf{1t}]^+(\text{PF}_6)$  and of the photoproduct  $[\mathbf{4}]^+(\text{PF}_6)$

**Table S1:** DFT coordinates

**S2:** Selection of the TD-DFT method for the computation of the UV-Vis spectra

**Table S2:** Crystal data of complex  $[\mathbf{1c}]^+(\text{CF}_3\text{CO}_2)$

**Table S3:** Crystal data of complex  $[\mathbf{2t}]^+(\text{PF}_6)$

**Table S4:** Crystal data of complex  $[\mathbf{3}]^+(\text{PF}_6)$

**Table S5:** Crystal data of complex  $[\mathbf{4}]^+(\text{PF}_6)$

**Table S6:** Selected bond lengths and angles of  $[\mathbf{1c}]^+(\text{PF}_6)$  and of the photoproduct:  $[\mathbf{4}]^+(\text{PF}_6)$

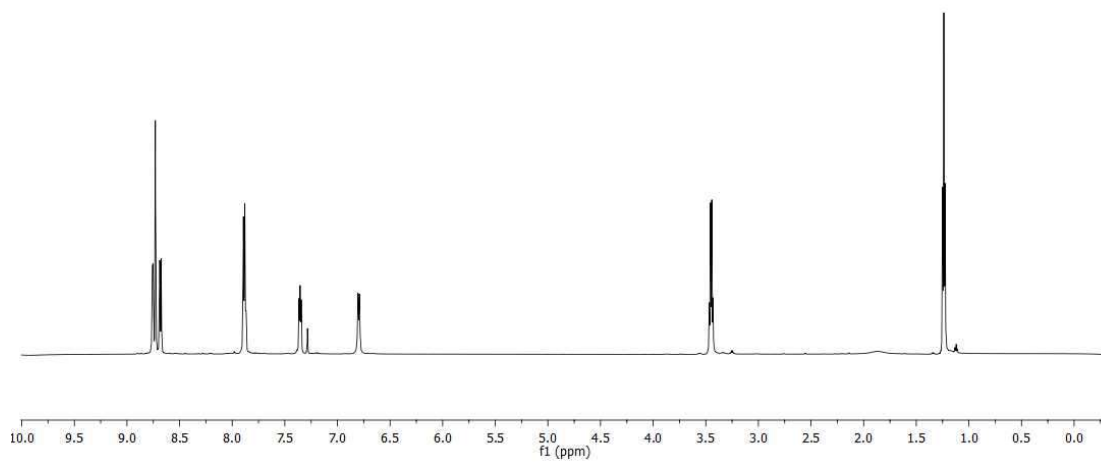

Fig. S1:  $^1\text{H}$  NMR of the ligand in  $\text{CDCl}_3$

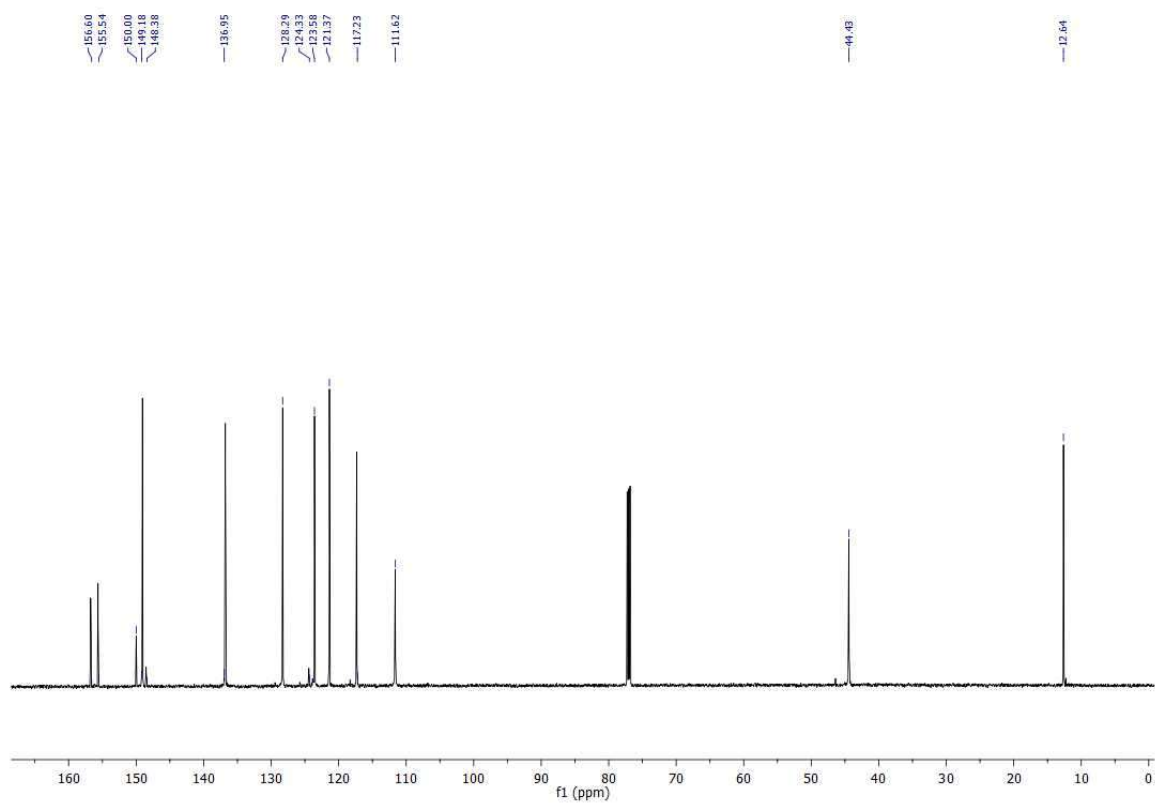

Fig. S2 :  $^{13}\text{C}$  NMR of the ligand in  $\text{CDCl}_3$ .

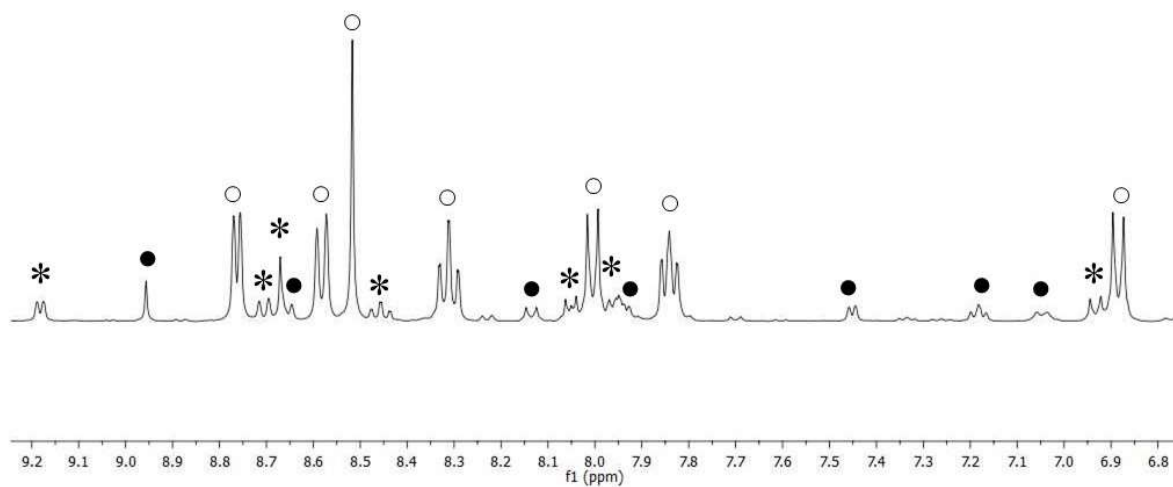

**Fig. S3** : <sup>1</sup>H NMR ( DMSO d<sub>6</sub>) of the crude reaction mixture in the synthesis of [1]<sup>+</sup>(PF<sub>6</sub>) : labels identify the different complexes: homoleptic (black spot), *cis* isomer (star) and *trans* isomer (white spot)

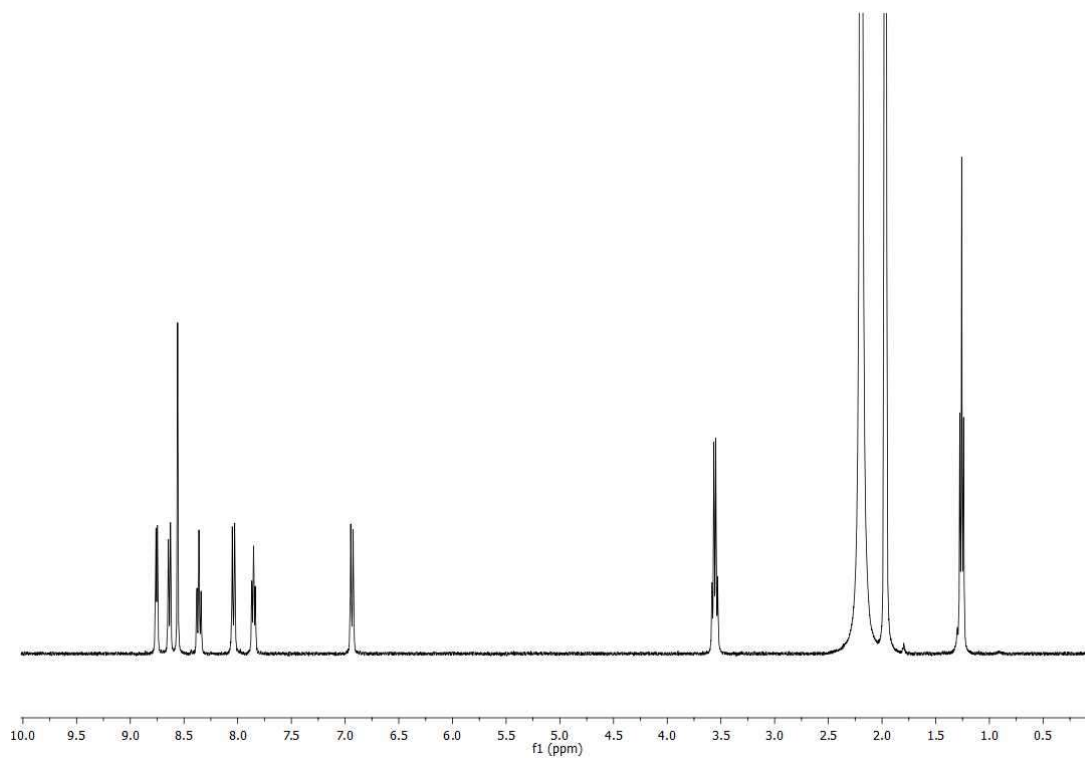

**Fig. S4** : <sup>1</sup>H NMR of [1t]<sup>+</sup>(PF<sub>6</sub>) in CD<sub>3</sub>CN.

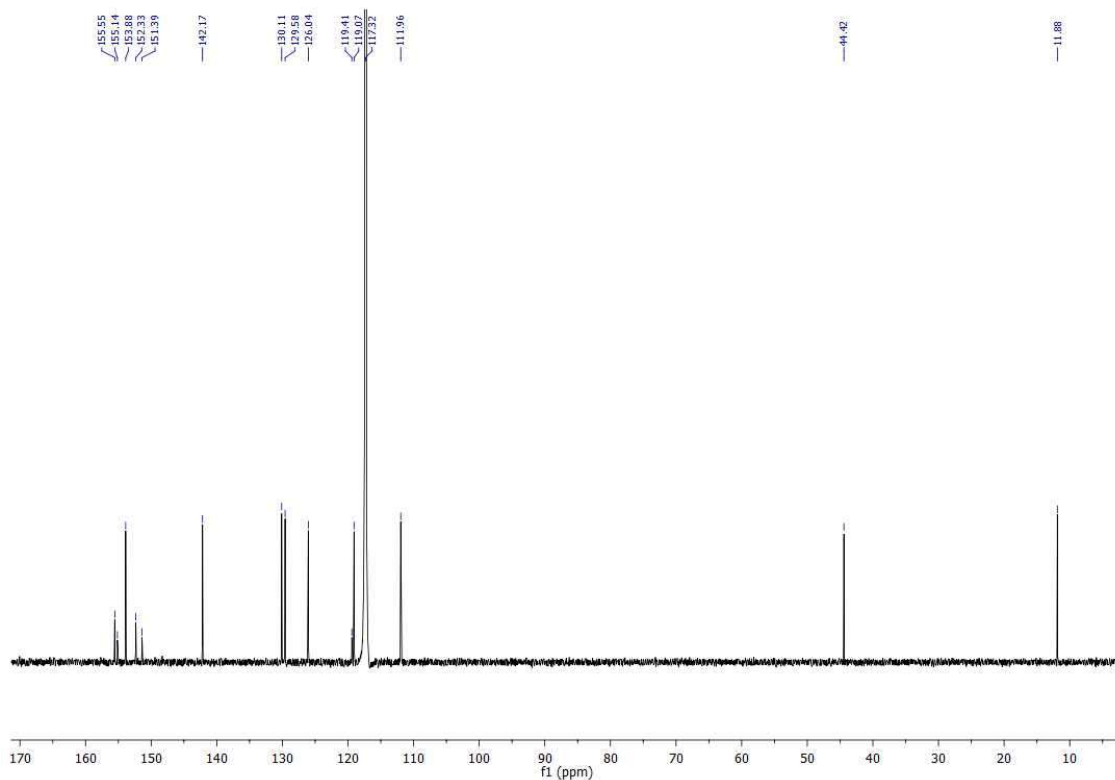

Fig. S5 :  $^{13}\text{C}$  NMR of  $[\mathbf{1t}]^+(\text{PF}_6)$  in  $\text{CD}_3\text{CN}$ .

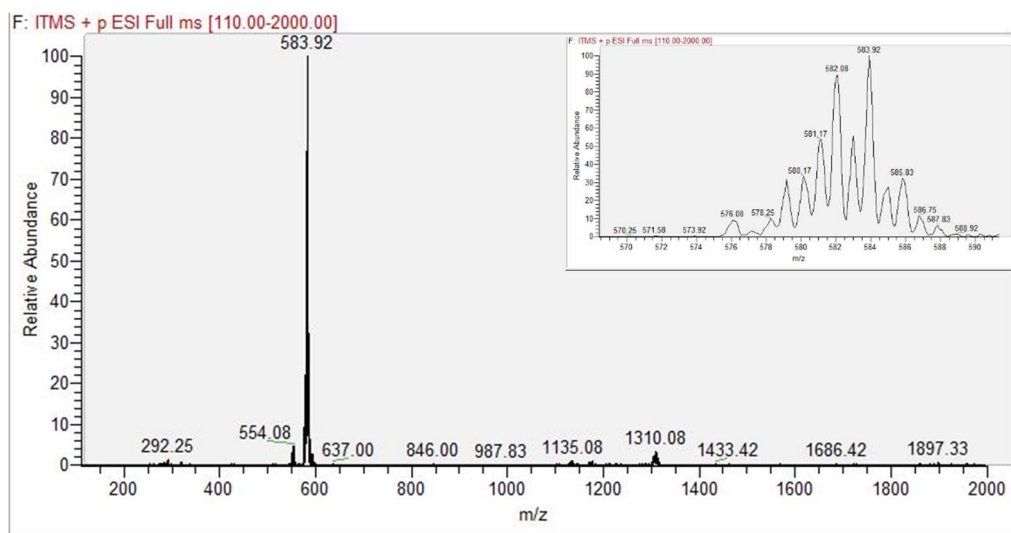

Fig. S6 : ESI mass spectrum of  $[\mathbf{1t}]^+(\text{PF}_6)$

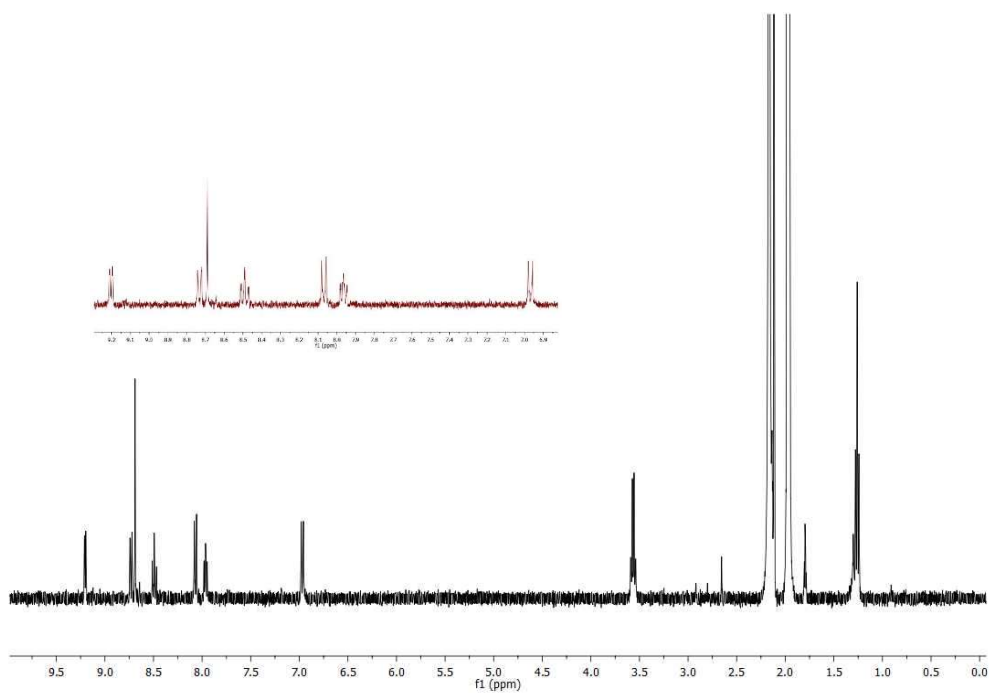

Fig. S7 :  $^1\text{H}$  NMR of  $[\mathbf{1c}]^+(\text{PF}_6)$  in  $\text{CD}_3\text{CN}$ .

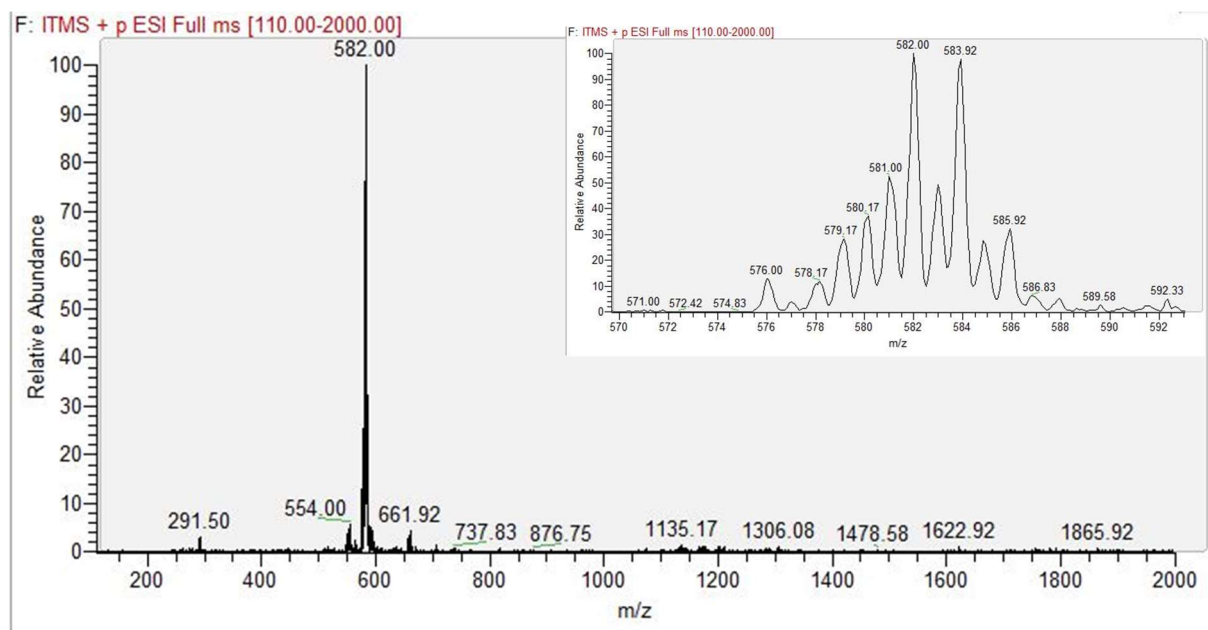

Fig. S8 : ESI mass spectrum of  $[\mathbf{1c}]^+(\text{PF}_6)$

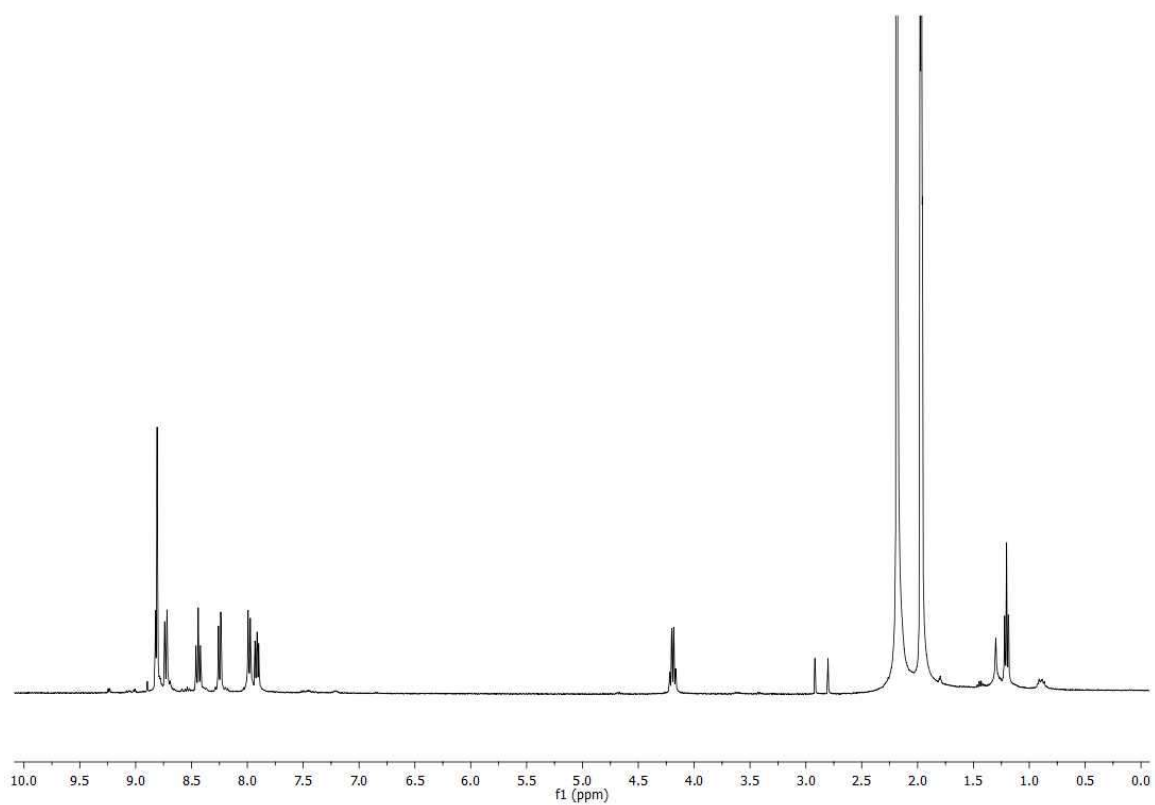

**Fig. S9:**  $^1\text{H}$  NMR of  $[\mathbf{2t}]^+(\text{PF}_6)$  in  $\text{CD}_3\text{CN}$ .

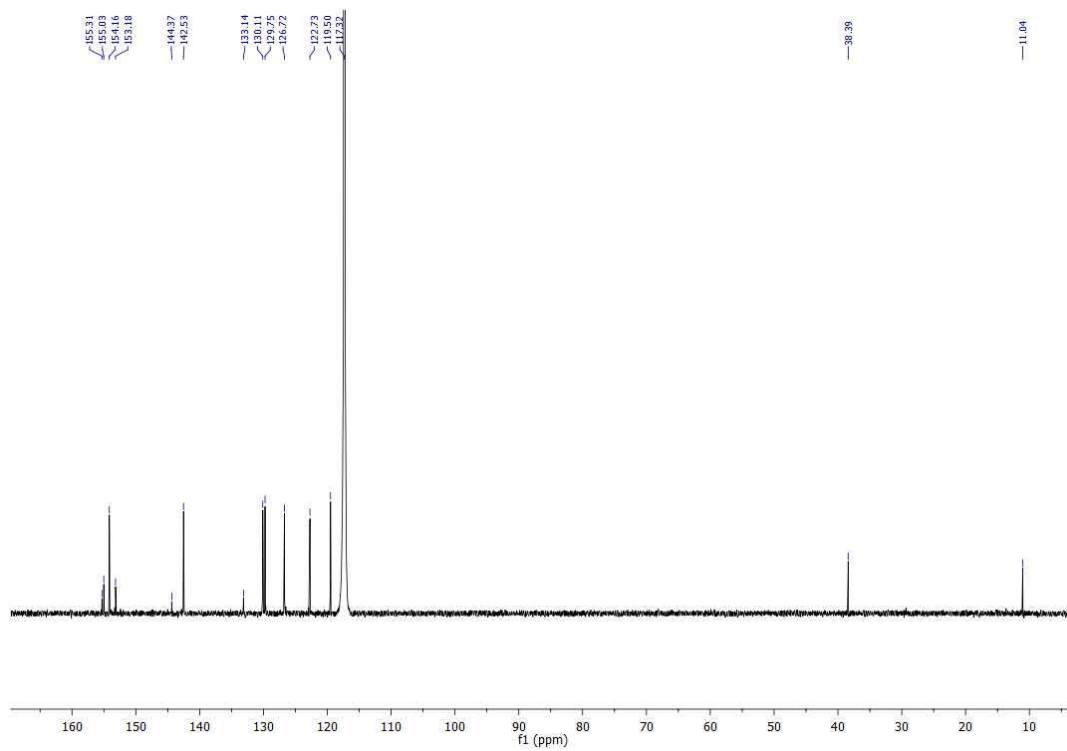

**Fig. S10:**  $^{13}\text{C}$  NMR of  $[\mathbf{2t}]^+(\text{PF}_6)$  in  $\text{CD}_3\text{CN}$ .

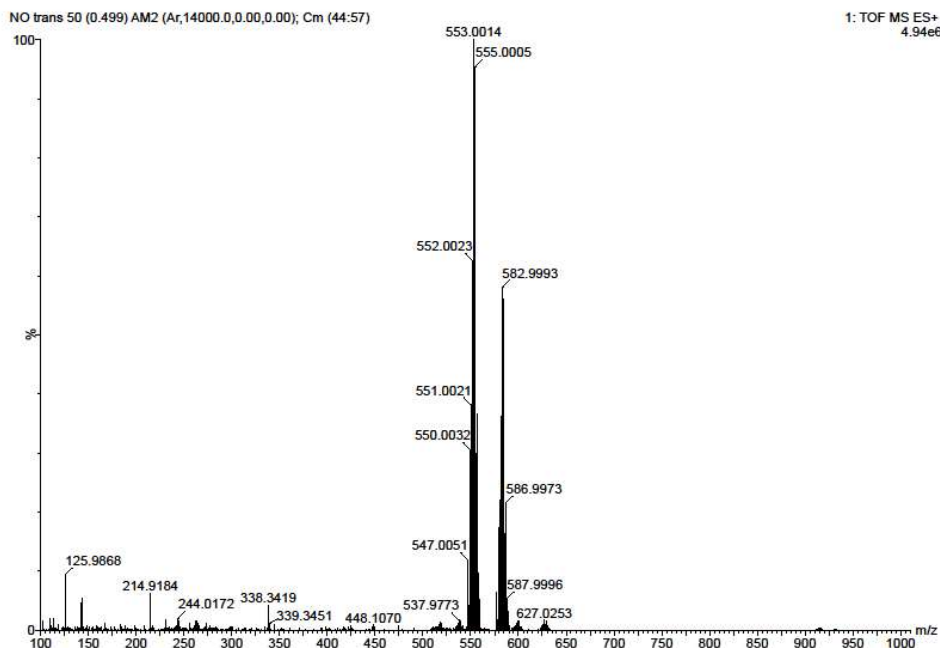

**Fig. S11** : HR ES mass spectrum of  $[2t]^+(\text{PF}_6)$

### S1: synthesis of $[3]^+(\text{PF}_6)$

To a dark-blue solution of about 10 mg of  $[1t]^+(\text{PF}_6)$  in 1mL of MeCN in a tube, were added 2 drops of nitric acid (65%). Instantaneously, the solution became colorless. The tube was left in a closed flask for diffusion with diethyloxide. After few days, brown crystals appeared and some of them were collected for  $^1\text{H}$  NMR measurement.

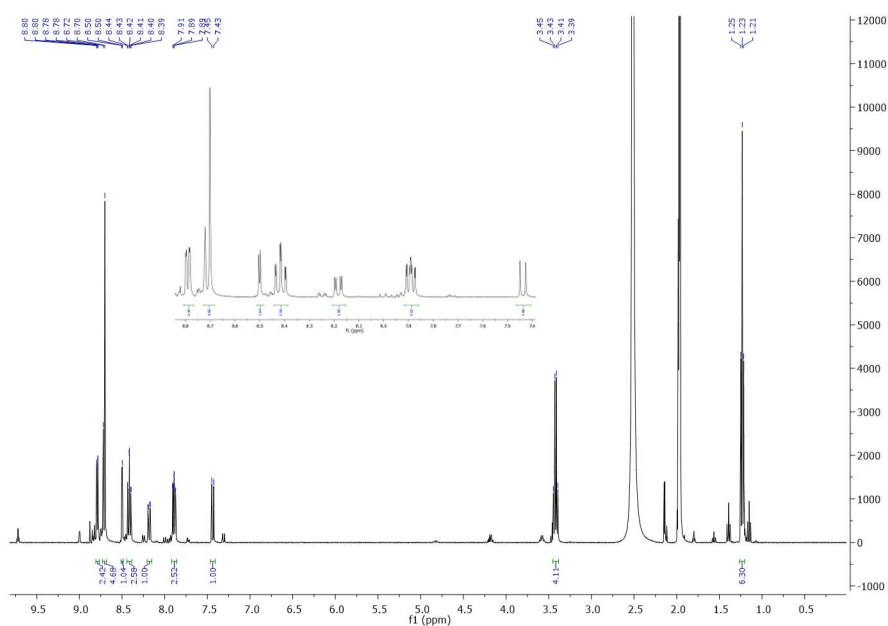

**Fig. S12**:  $^1\text{H}$  NMR of complex **3** (with zoom of the aromatic part as insert)



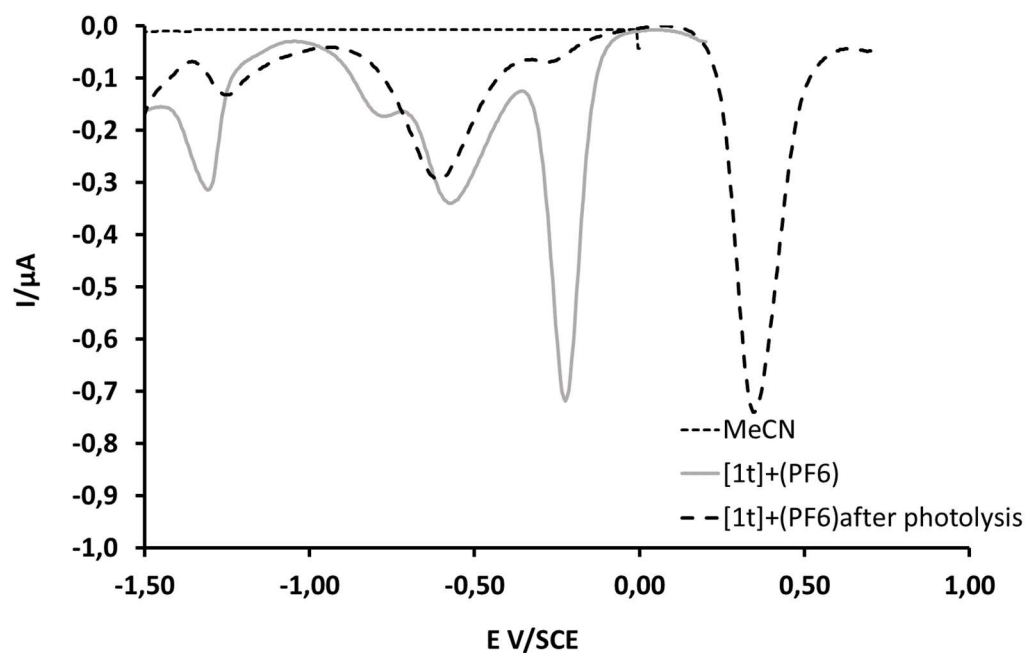

(a)

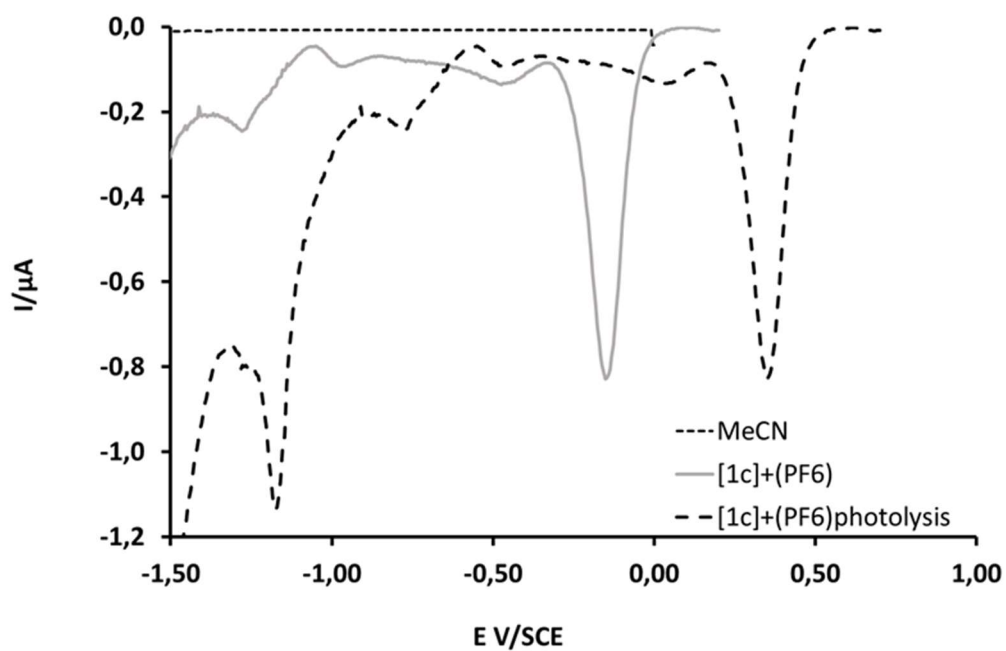

(b)

**Fig. S13** : Square wave voltammograms in reduction for (a)  $[1t]^+(\text{PF}_6)$  and (b)  $[1c]^+(\text{PF}_6)$  before (in grey) and after irradiation ( with a Xenon lamp (complex 1mM in MeCN), 0.1M  $(\text{nBu}_4)\text{PF}_6$ )

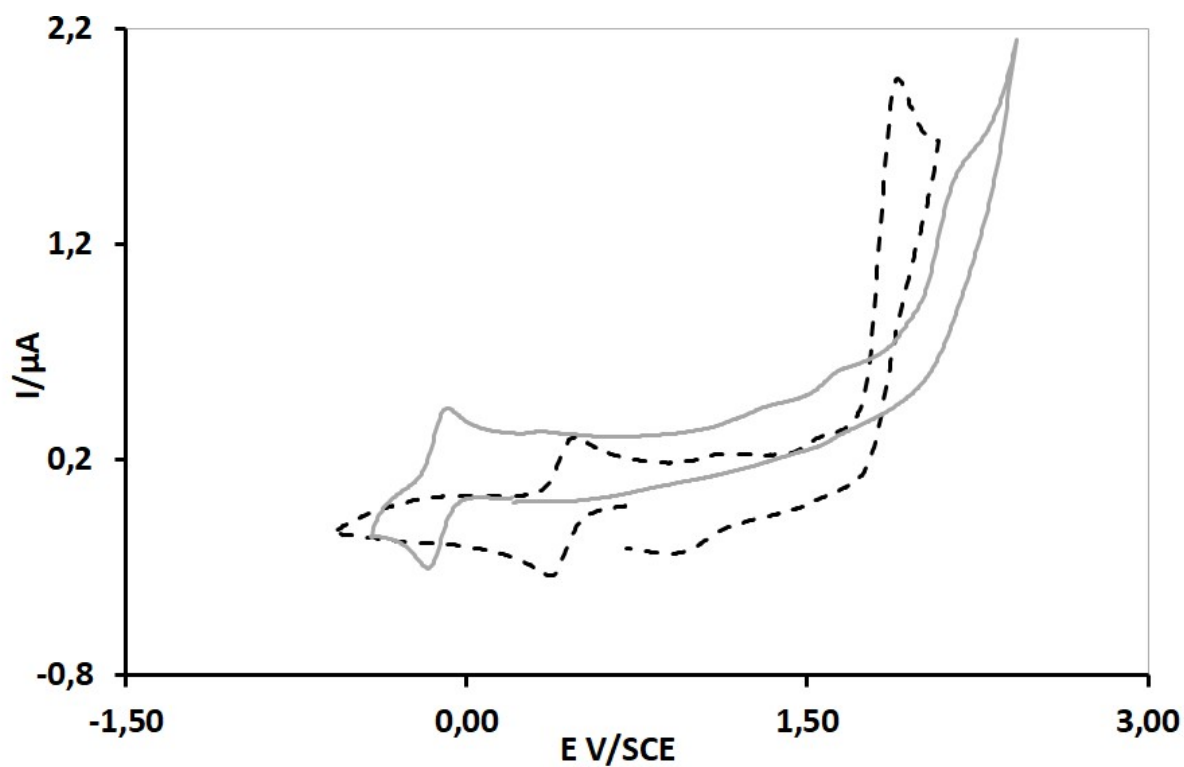

**Fig. S14:** CV of  $[2\text{t}]^+(\text{PF}_6)$  before (in grey) and after irradiation ( with a Xenon lamp (complex 1mM in MeCN), 0.1M  $(\text{nBu}_4)[\text{PF}_6]$ , working electrode Pt disk, scan 0.2 V/s

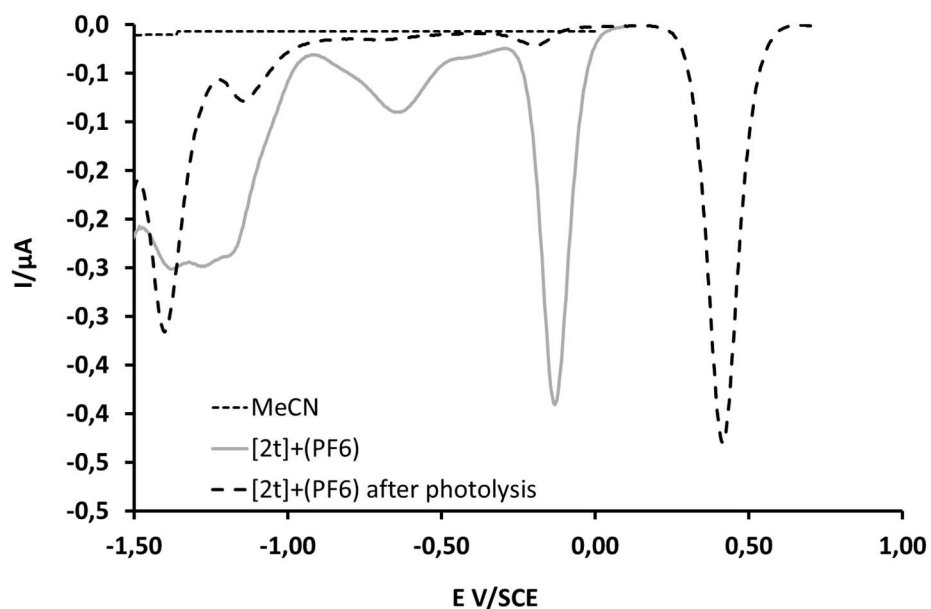

**Fig. S15 :** Square wave voltammograms in reduction for (a)  $[2\text{t}]^+(\text{PF}_6)$  before (in grey) and after irradiation ( with a Xenon lamp (complex 1mM in MeCN), 0.1M  $(\text{nBu}_4)[\text{PF}_6]$

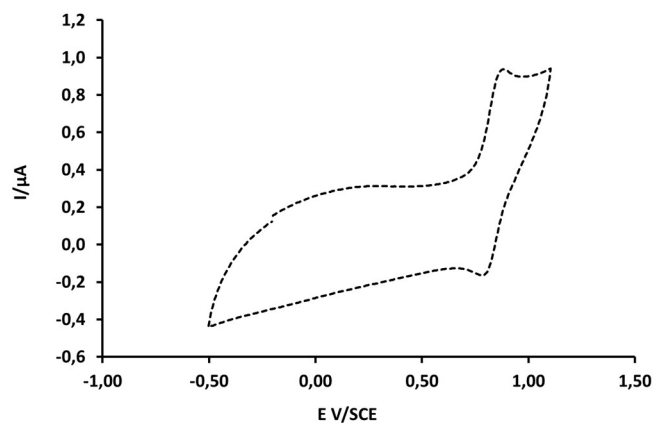

**Fig. S16** : CV of ligand  $\text{NEt}_2\text{Phtpy}$  in MeCN, 0.1M  $(\text{nBu}_4)\text{PF}_6$ , working electrode Pt disk, scan 0.2 V/s

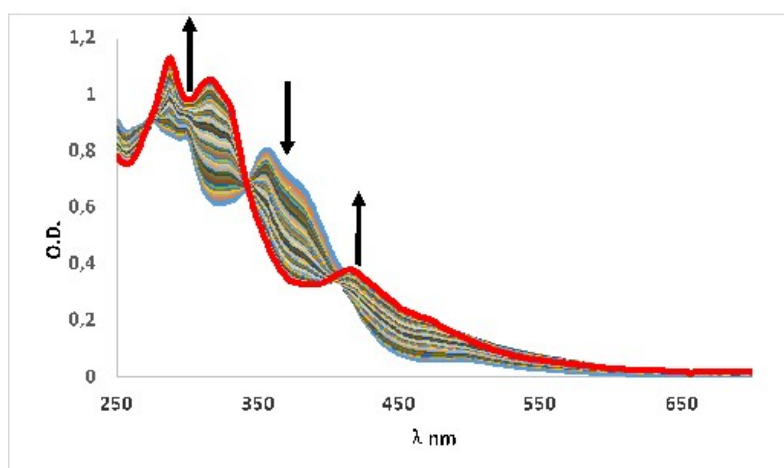

**Fig. S17** : Evolution of the electronic spectrum of  $[2\text{t}]^+(\text{PF}_6)$  during irradiation at 365 nm.

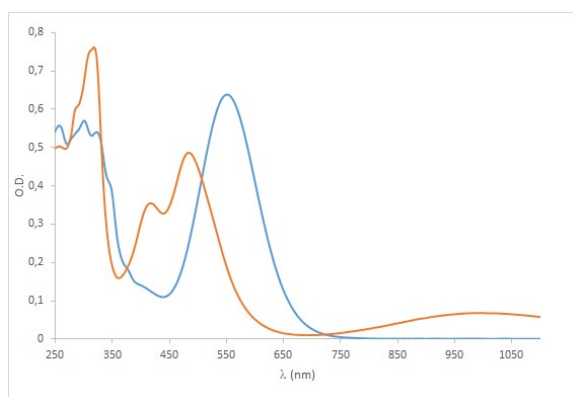

**Fig. S18** : Absorption spectra of  $[1\text{t}]^+(\text{PF}_6)$  (blue) and of the photoproduct  $[4]^+(\text{PF}_6)$  (orange)

**Table S1:** DFT coordinates

| [1c] <sup>+</sup> | cis(Cl,Cl)[(NEt <sub>2</sub> Phtpy)RuCl <sub>2</sub> (NO)] <sup>+</sup> |           |           |
|-------------------|-------------------------------------------------------------------------|-----------|-----------|
| Ru                | -3.081505                                                               | -0.008093 | 0.109561  |
| Cl                | -2.940018                                                               | 0.163693  | -2.245702 |
| N                 | -1.110923                                                               | -0.007365 | 0.093639  |
| C                 | -0.473600                                                               | -1.185342 | -0.026583 |
| C                 | -1.386751                                                               | -2.339056 | -0.158755 |
| N                 | -2.716091                                                               | 2.042106  | 0.163314  |
| N                 | -2.716436                                                               | -2.043851 | -0.140404 |
| C                 | -3.260390                                                               | -4.337598 | -0.450410 |
| H                 | -4.027361                                                               | -5.094892 | -0.564715 |
| C                 | -0.473924                                                               | 1.176002  | 0.135776  |
| C                 | 0.908256                                                                | 1.202984  | 0.115018  |
| H                 | 1.428850                                                                | 2.149493  | 0.189844  |
| C                 | -3.258729                                                               | 4.356650  | 0.209394  |
| H                 | -4.025571                                                               | 5.122636  | 0.216326  |
| C                 | -1.386201                                                               | 2.336486  | 0.183765  |
| C                 | 1.640924                                                                | -0.002186 | 0.030147  |
| C                 | -0.962380                                                               | -3.651469 | -0.318135 |
| H                 | 0.095331                                                                | -3.886497 | -0.332463 |
| C                 | 0.908544                                                                | -1.207837 | -0.057578 |
| H                 | 1.429018                                                                | -2.148449 | -0.187450 |
| C                 | -3.627427                                                               | -3.007688 | -0.284378 |
| H                 | -4.662870                                                               | -2.685135 | -0.265249 |
| C                 | -3.626568                                                               | 3.017150  | 0.172719  |
| H                 | -4.662547                                                               | 2.696567  | 0.148682  |
| C                 | -0.961058                                                               | 3.657643  | 0.222439  |
| H                 | 0.096856                                                                | 3.891482  | 0.238110  |
| C                 | -1.907734                                                               | 4.677896  | 0.236702  |
| H                 | -1.586370                                                               | 5.713747  | 0.266935  |
| C                 | -1.909662                                                               | -4.660740 | -0.464591 |
| H                 | -1.588749                                                               | -5.689463 | -0.590694 |
| Cl                | -5.514668                                                               | 0.013052  | -0.098452 |
| N                 | -3.344994                                                               | -0.137268 | 1.833572  |
| O                 | -3.644831                                                               | -0.221404 | 2.926870  |
| C                 | 3.835789                                                                | -1.130809 | 0.423508  |
| H                 | 3.323216                                                                | -2.016487 | 0.788298  |
| C                 | 5.214021                                                                | -1.137059 | 0.433514  |
| H                 | 5.720466                                                                | -2.023275 | 0.796796  |
| C                 | 5.959866                                                                | -0.002200 | 0.018060  |
| C                 | 5.212950                                                                | 1.131829  | -0.397988 |
| H                 | 5.718607                                                                | 2.017619  | -0.763381 |
| C                 | 3.834872                                                                | 1.125956  | -0.384617 |
| H                 | 3.322493                                                                | 2.011922  | -0.748703 |
| C                 | 3.095335                                                                | -0.002128 | 0.021156  |
| N                 | 7.319446                                                                | -0.001034 | 0.018929  |
| C                 | 8.378597                                                                | -1.379749 | 1.803212  |
| C                 | 8.091971                                                                | -1.199160 | 0.316971  |
| H                 | 8.987268                                                                | -2.275806 | 1.964381  |
| H                 | 7.452791                                                                | -1.485765 | 2.378099  |

|   |          |           |           |
|---|----------|-----------|-----------|
| H | 8.927851 | -0.519542 | 2.200994  |
| H | 7.576799 | -2.073891 | -0.091624 |
| H | 9.033642 | -1.120727 | -0.236845 |
| C | 8.381889 | 1.378437  | -1.762647 |
| C | 8.090466 | 1.198569  | -0.277251 |
| H | 8.987706 | 2.276607  | -1.922941 |
| H | 7.457718 | 1.480126  | -2.340962 |
| H | 8.935830 | 0.519701  | -2.157210 |
| H | 7.571907 | 2.072535  | 0.128712  |
| H | 9.030295 | 1.122537  | 0.279990  |

**[1t]<sup>+</sup> trans(Cl,Cl)[(NEt<sub>2</sub>Phtpy)RuCl<sub>2</sub>(NO)]<sup>+</sup>**

|    |           |           |           |
|----|-----------|-----------|-----------|
| C  | 3.029030  | 0.036504  | 3.646367  |
| H  | 2.740577  | 0.034558  | 4.690127  |
| C  | 4.366331  | 0.049826  | 3.274057  |
| H  | 5.131963  | 0.059045  | 4.041174  |
| C  | 4.685664  | 0.049947  | 1.922671  |
| H  | 5.720313  | 0.059378  | 1.596719  |
| C  | 3.659129  | 0.036974  | 0.985394  |
| H  | 3.884381  | 0.035107  | -0.074365 |
| C  | 2.339172  | 0.025282  | 1.417842  |
| C  | 1.177070  | 0.009167  | 0.516221  |
| C  | 1.204948  | 0.013409  | -0.864921 |
| H  | 2.155480  | 0.057927  | -1.380947 |
| C  | 0.000000  | 0.000000  | -1.601941 |
| C  | -1.204948 | -0.013409 | -0.864921 |
| H  | -2.155480 | -0.057927 | -1.380947 |
| C  | -1.177070 | -0.009167 | 0.516221  |
| C  | -2.339172 | -0.025282 | 1.417842  |
| C  | -3.659129 | -0.036974 | 0.985394  |
| H  | -3.884381 | -0.035107 | -0.074365 |
| C  | -4.685664 | -0.049947 | 1.922671  |
| H  | -5.720313 | -0.059378 | 1.596719  |
| C  | -4.366331 | -0.049826 | 3.274057  |
| H  | -5.131963 | -0.059045 | 4.041174  |
| C  | -3.029030 | -0.036504 | 3.646367  |
| H  | -2.740577 | -0.034558 | 4.690127  |
| N  | 2.041898  | 0.024867  | 2.744519  |
| N  | 0.000000  | 0.000000  | 1.167696  |
| N  | -2.041898 | -0.024867 | 2.744519  |
| Cl | 0.030934  | -2.400829 | 3.020798  |
| Ru | 0.000000  | 0.000000  | 3.161429  |
| C  | -1.115097 | 0.439270  | -3.796293 |
| H  | -1.995454 | 0.818116  | -3.285327 |
| C  | -1.122133 | 0.448017  | -5.173933 |
| H  | -2.013064 | 0.800223  | -5.679638 |
| C  | 0.000000  | 0.000000  | -5.921029 |
| C  | 1.122133  | -0.448017 | -5.173933 |
| H  | 2.013064  | -0.800223 | -5.679638 |
| C  | 1.115097  | -0.439270 | -3.796293 |
| H  | 1.995454  | -0.818116 | -3.285327 |

|    |           |           |           |
|----|-----------|-----------|-----------|
| C  | 0.000000  | 0.000000  | -3.055126 |
| N  | 0.000000  | 0.000000  | -7.280079 |
| C  | -2.215965 | -0.464672 | -8.315586 |
| C  | -1.107645 | 0.547908  | -8.051922 |
| H  | -3.008236 | -0.009828 | -8.919537 |
| H  | -2.658993 | -0.821472 | -7.380137 |
| H  | -1.828019 | -1.332361 | -8.859939 |
| H  | -1.500701 | 1.435640  | -7.546759 |
| H  | -0.692903 | 0.903167  | -9.001011 |
| C  | 2.215965  | 0.464672  | -8.315586 |
| C  | 1.107645  | -0.547908 | -8.051922 |
| H  | 3.008236  | 0.009828  | -8.919537 |
| H  | 2.658993  | 0.821472  | -7.380137 |
| H  | 1.828019  | 1.332361  | -8.859939 |
| H  | 1.500701  | -1.435640 | -7.546759 |
| H  | 0.692903  | -0.903167 | -9.001011 |
| Cl | -0.030934 | 2.400829  | 3.020798  |
| N  | 0.000000  | 0.000000  | 4.920963  |
| O  | 0.000000  | 0.000000  | 6.056970  |

**[2t]<sup>+</sup> trans(Cl,Cl)[((Et)(ON)NPhtpy)RuCl<sub>2</sub>(NO)]<sup>+</sup>**

|    |           |           |           |
|----|-----------|-----------|-----------|
| C  | 3.519900  | 3.083632  | 0.167294  |
| H  | 4.572209  | 2.829008  | 0.156955  |
| C  | 3.105101  | 4.407386  | 0.235990  |
| H  | 3.848159  | 5.195175  | 0.280502  |
| C  | 1.745066  | 4.684749  | 0.245740  |
| H  | 1.387044  | 5.707285  | 0.299147  |
| C  | 0.839895  | 3.630667  | 0.185454  |
| H  | -0.226440 | 3.822547  | 0.191861  |
| C  | 1.314935  | 2.327638  | 0.117663  |
| C  | 0.448301  | 1.141433  | 0.049286  |
| C  | -0.937518 | 1.127398  | 0.043906  |
| H  | -1.491241 | 2.055415  | 0.114375  |
| C  | -1.621417 | -0.097579 | -0.016904 |
| C  | -0.865549 | -1.280059 | -0.068758 |
| H  | -1.363173 | -2.239101 | -0.144876 |
| C  | 0.518857  | -1.211775 | -0.057991 |
| C  | 1.456197  | -2.343618 | -0.114702 |
| C  | 1.062330  | -3.673486 | -0.177750 |
| H  | 0.009903  | -3.930569 | -0.186610 |
| C  | 2.030290  | -4.670656 | -0.229824 |
| H  | 1.735364  | -5.713345 | -0.279787 |
| C  | 3.370785  | -4.311100 | -0.216276 |
| H  | 4.160490  | -5.052430 | -0.254842 |
| C  | 3.703653  | -2.964196 | -0.150040 |
| H  | 4.738204  | -2.645088 | -0.134819 |
| N  | 2.650008  | 2.070675  | 0.110657  |
| N  | 1.126211  | -0.016039 | -0.001474 |
| N  | 2.773187  | -2.006095 | -0.100734 |
| Cl | 2.976584  | 0.168293  | -2.387708 |
| Ru | 3.127688  | 0.044776  | 0.006227  |

|    |           |           |           |
|----|-----------|-----------|-----------|
| C  | -3.784478 | -1.206734 | 0.568299  |
| H  | -3.239663 | -2.004489 | 1.064351  |
| C  | -5.166841 | -1.256703 | 0.562307  |
| H  | -5.682457 | -2.088037 | 1.026056  |
| C  | -5.903576 | -0.228467 | -0.044286 |
| C  | -5.224470 | 0.839018  | -0.641429 |
| H  | -5.765449 | 1.650068  | -1.114634 |
| C  | -3.837833 | 0.878708  | -0.627133 |
| H  | -3.339312 | 1.707496  | -1.120693 |
| C  | -3.090470 | -0.140478 | -0.025002 |
| N  | -7.310355 | -0.270255 | -0.058813 |
| N  | -7.886572 | -1.097776 | 0.817083  |
| O  | -9.106052 | -1.104503 | 0.794164  |
| C  | -8.597186 | 1.842831  | -0.303841 |
| C  | -8.132270 | 0.545573  | -0.950635 |
| H  | -9.225380 | 2.396673  | -1.008260 |
| H  | -7.753758 | 2.480588  | -0.021709 |
| H  | -9.187756 | 1.633084  | 0.592099  |
| H  | -7.554883 | 0.723469  | -1.859760 |
| H  | -8.991815 | -0.076003 | -1.213310 |
| Cl | 2.967664  | -0.088159 | 2.398673  |
| N  | 4.885492  | 0.091096  | 0.009323  |
| O  | 6.019987  | 0.113190  | 0.007467  |

**[4]<sup>+</sup> trans(Cl,Cl)[(NEt<sub>2</sub>Phtpy)RuCl<sub>2</sub>(MeCN)]<sup>+</sup>**

|   |           |           |           |
|---|-----------|-----------|-----------|
| C | 3.440821  | 3.031503  | 0.052997  |
| H | 4.479467  | 2.721435  | 0.053736  |
| C | 3.076624  | 4.371144  | 0.071004  |
| H | 3.844915  | 5.135713  | 0.086464  |
| C | 1.725156  | 4.696527  | 0.067735  |
| H | 1.405445  | 5.733295  | 0.080551  |
| C | 0.780358  | 3.676905  | 0.047204  |
| H | -0.277967 | 3.909947  | 0.043002  |
| C | 1.206129  | 2.353799  | 0.031072  |
| C | 0.296818  | 1.195731  | 0.007903  |
| C | -1.087932 | 1.219621  | 0.013229  |
| H | -1.610201 | 2.167006  | 0.063288  |
| C | -1.815277 | 0.012339  | -0.006296 |
| C | -1.077809 | -1.192970 | -0.027054 |
| H | -1.597410 | -2.141776 | -0.075933 |
| C | 0.304533  | -1.165174 | -0.022627 |
| C | 1.211355  | -2.333929 | -0.044061 |
| C | 0.770601  | -3.650838 | -0.066456 |
| H | -0.289608 | -3.874665 | -0.069590 |
| C | 1.705008  | -4.682335 | -0.084345 |
| H | 1.371840  | -5.714829 | -0.102304 |
| C | 3.059646  | -4.374924 | -0.078485 |
| H | 3.818502  | -5.148841 | -0.091450 |
| C | 3.438064  | -3.038456 | -0.054623 |
| H | 4.479668  | -2.738985 | -0.048013 |
| N | 2.534308  | 2.050262  | 0.033564  |

|    |           |           |           |
|----|-----------|-----------|-----------|
| N  | 0.945728  | 0.018236  | -0.007159 |
| N  | 2.543099  | -2.048870 | -0.038098 |
| Cl | 2.938723  | 0.082275  | -2.360138 |
| Ru | 2.898415  | 0.015767  | 0.000366  |
| C  | -4.006203 | -1.099025 | 0.470819  |
| H  | -3.488843 | -1.963994 | 0.876233  |
| C  | -5.385143 | -1.112509 | 0.482456  |
| H  | -5.885681 | -1.994582 | 0.863519  |
| C  | -6.138064 | -0.009628 | 0.000959  |
| C  | -5.397751 | 1.100144  | -0.484665 |
| H  | -5.908311 | 1.977187  | -0.864103 |
| C  | -4.018745 | 1.099721  | -0.479273 |
| H  | -3.510833 | 1.969335  | -0.886724 |
| C  | -3.272619 | 0.003985  | -0.005585 |
| N  | -7.499209 | -0.016063 | 0.004393  |
| C  | -8.527377 | -2.253207 | -0.369437 |
| C  | -8.263339 | -1.104641 | 0.597455  |
| H  | -9.125795 | -3.029844 | 0.118647  |
| H  | -7.591782 | -2.705880 | -0.713564 |
| H  | -9.077481 | -1.901621 | -1.248969 |
| H  | -7.752364 | -1.461046 | 1.497414  |
| H  | -9.212937 | -0.681183 | 0.941312  |
| C  | -8.546141 | 2.211122  | 0.385220  |
| C  | -8.276786 | 1.065578  | -0.583797 |
| H  | -9.153950 | 2.982704  | -0.099256 |
| H  | -7.612834 | 2.671849  | 0.724842  |
| H  | -9.088557 | 1.854105  | 1.267339  |
| H  | -7.774216 | 1.427242  | -1.486366 |
| H  | -9.224262 | 0.633423  | -0.922667 |
| Cl | 2.914904  | -0.002512 | 2.362096  |
| N  | 4.973469  | -0.043108 | 0.011004  |
| C  | 6.128316  | -0.081611 | 0.018834  |
| C  | 7.574923  | -0.132537 | 0.029630  |
| H  | 7.980379  | 0.828167  | -0.299879 |
| H  | 7.927092  | -0.344303 | 1.043069  |
| H  | 7.921054  | -0.920773 | -0.644794 |



## S2: Selection of the TD-DFT method for the computation of the UV-Vis spectra

It was achieved based on the capability to reproduce satisfactorily the energy of the low lying transition of **1t**. PBE0 outperform the standard B3LYP, B3PW91 and CAM-B3LYP methods.

Exp. (UV-Vis) 550 nm

PBE0 656 nm ( $\Delta$  vs exp. = 2940  $\text{cm}^{-1}$ )

B3LYP 732 nm ( $\Delta$  vs exp. = 4520  $\text{cm}^{-1}$ )

B3PW91 717 nm ( $\Delta$  vs exp. = 4230  $\text{cm}^{-1}$ )

CAM-B3LYP 451 nm ( $\Delta$  vs exp. = 3390  $\text{cm}^{-1}$ )

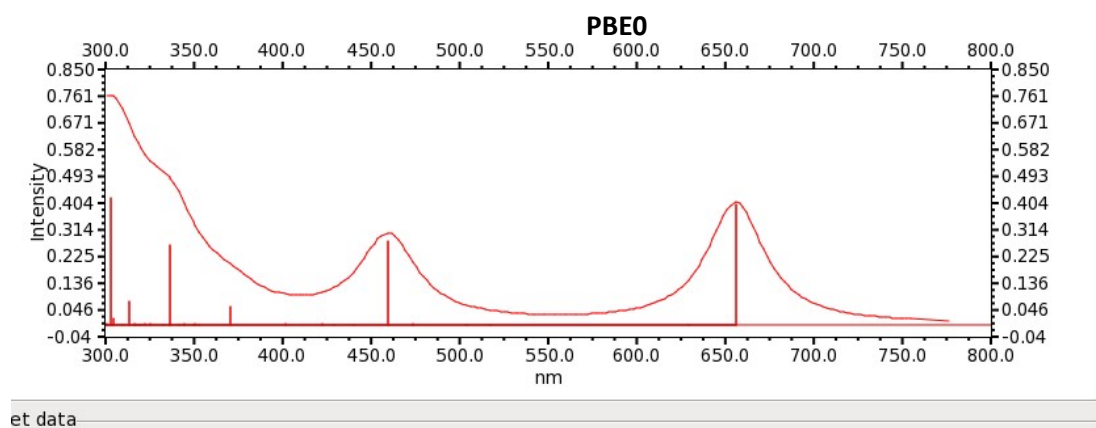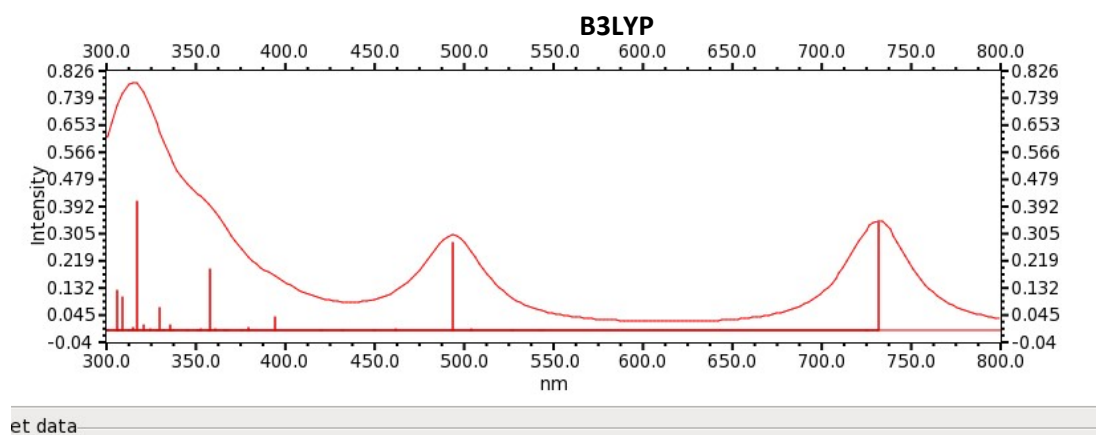

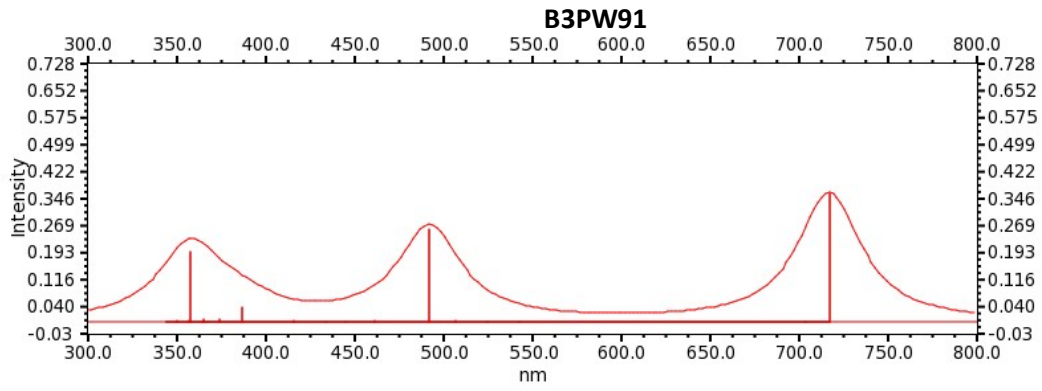

et data

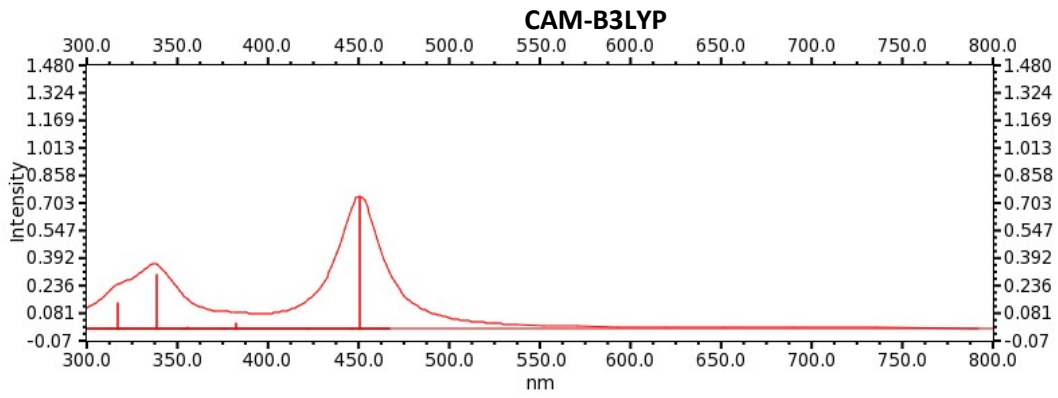

et data

**Table S2:** Crystal data of complex [1c]<sup>+</sup>(CF<sub>3</sub>CO<sub>2</sub>)

Crystals obtained after diffusion of diethyloxide in a solution of the complex in acetonitrile.

|                                   |                                                                                                                     |
|-----------------------------------|---------------------------------------------------------------------------------------------------------------------|
| Empirical formula                 | C <sub>25</sub> H <sub>24</sub> Cl <sub>2</sub> N <sub>5</sub> O Ru, C <sub>2</sub> F <sub>3</sub> O <sub>2</sub>   |
| Formula weight                    | 695.48                                                                                                              |
| Temperature                       | 100 (2) K                                                                                                           |
| Wavelength                        | 0.71073 Å                                                                                                           |
| Crystal system, space group       | Orthorhombic, P b c n                                                                                               |
| Unit cell dimensions              | a = 25.0164(18) Å    alpha = 90 deg.<br>b = 15.6581(11) Å    beta = 90 deg.<br>c = 14.4095(11) Å    gamma = 90 deg. |
| Volume                            | 5644.3(7) Å <sup>3</sup>                                                                                            |
| Z, Calculated density             | 8, 1.637 Mg/m <sup>3</sup>                                                                                          |
| Absorption coefficient            | 0.804 mm <sup>-1</sup>                                                                                              |
| Max. and min. transmission        | 0.7454 and 0.6802                                                                                                   |
| F(000)                            | 2800                                                                                                                |
| Crystal size                      | 0.200 x 0.060 x 0.020 mm                                                                                            |
| Theta range for data collection   | 1.534 to 26.395 deg.                                                                                                |
| Limiting indices                  | -31<=h<=30, -19<=k<=19, -18<=l<=18                                                                                  |
| Reflections collected / unique    | 96772 / 5775 [R(int) = 0.0624]                                                                                      |
| Completeness to theta = 25.242    | 100.0 %                                                                                                             |
| Refinement method                 | Full-matrix least-squares on F <sup>2</sup>                                                                         |
| Data / restraints / parameters    | 5775 / 579 / 520                                                                                                    |
| Goodness-of-fit on F <sup>2</sup> | 1.076                                                                                                               |
| Final R indices [I>2sigma(I)]     | R1 = 0.0812, wR2 = 0.2006                                                                                           |
| R indices (all data)              | R1 = 0.1138, wR2 = 0.2260                                                                                           |
| Largest diff. peak and hole       | 1.913 and -0.811 e.Å <sup>-3</sup>                                                                                  |

**Table S3:** Crystal data of complex [2t]<sup>+</sup>(PF<sub>6</sub>)

Crystals obtained after diffusion of diethyloxide in a solution of the complex in acetone.

|                                   |                                                                                                                                            |
|-----------------------------------|--------------------------------------------------------------------------------------------------------------------------------------------|
| Empirical formula                 | C <sub>23</sub> H <sub>19</sub> Cl <sub>2</sub> N <sub>6</sub> O <sub>2</sub> Ru, F <sub>6</sub> P, 2(C <sub>3</sub> H <sub>6</sub> O)     |
| Formula weight                    | 844.54                                                                                                                                     |
| Temperature                       | 100(2) K                                                                                                                                   |
| Wavelength                        | 0.71073 Å                                                                                                                                  |
| Crystal system, space group       | triclinic, P -1                                                                                                                            |
| Unit cell dimensions              | a = 11.7489(10) Å    alpha = 92.726(3) deg.<br>b = 12.6748(11) Å    beta = 106.873(3) deg.<br>c = 13.5235(12) Å    gamma = 117.004(3) deg. |
| Volume                            | 1678.6(3) Å <sup>3</sup>                                                                                                                   |
| Z, Calculated density             | 2, 1.671 Mg/m <sup>3</sup>                                                                                                                 |
| Absorption coefficient            | 0.752 mm <sup>-1</sup>                                                                                                                     |
| F(000)                            | 852                                                                                                                                        |
| Crystal size                      | 0.10 x 0.04 x 0.02 mm                                                                                                                      |
| Theta range for data collection   | 1.61 to 26.73 deg.                                                                                                                         |
| Limiting indices                  | -14 ≤ h ≤ 14, -16 ≤ k ≤ 16,<br>-17 ≤ l ≤ 17                                                                                                |
| Reflections collected / unique    | 53504 / 7112 [R(int) = 0.0492]                                                                                                             |
| Completeness to theta = 26.73     | 100.0 %                                                                                                                                    |
| Max. and min. transmission        | 0.7459 and 0.7060                                                                                                                          |
| Refinement method                 | Full-matrix least-squares on F <sup>2</sup>                                                                                                |
| Data / restraints / parameters    | 7112 / 0 / 447                                                                                                                             |
| Goodness-of-fit on F <sup>2</sup> | 1.042                                                                                                                                      |
| Final R indices [I > 2σ(I)]       | R <sub>1</sub> = 0.0315, wR <sub>2</sub> = 0.0714                                                                                          |
| R indices (all data)              | R <sub>1</sub> = 0.0402, wR <sub>2</sub> = 0.0761                                                                                          |
| Largest diff. peak and hole       | 1.073 and -0.539 e.Å <sup>-3</sup>                                                                                                         |

**Table S4:** Crystal data of complex [3]<sup>+</sup>(PF<sub>6</sub>)

Crystals obtained after diffusion of diethyloxide in a solution of the complex in acetonitrile.

|                                   |                                                                                                                                         |
|-----------------------------------|-----------------------------------------------------------------------------------------------------------------------------------------|
| Empirical formula                 | C <sub>25</sub> H <sub>23</sub> Cl <sub>2</sub> N <sub>6</sub> O <sub>3</sub> Ru, F <sub>6</sub> P                                      |
| Formula weight                    | 772.43                                                                                                                                  |
| Temperature                       | 100(2) K                                                                                                                                |
| Wavelength                        | 0.71073 Å                                                                                                                               |
| Crystal system, space group       | triclinic, P -1                                                                                                                         |
| Unit cell dimensions              | a = 11.546(4) Å    alpha = 97.082(12) deg.<br>b = 12.407(4) Å    beta = 100.947(13) deg.<br>c = 13.352(4) Å    gamma = 116.663(13) deg. |
| Volume                            | 1630.1(10) Å <sup>3</sup>                                                                                                               |
| Z, Calculated density             | 2, 1.574 Mg/m <sup>3</sup>                                                                                                              |
| Absorption coefficient            | 0.765 mm <sup>-1</sup>                                                                                                                  |
| Max. and min. transmission        | 0.7465 and 0.7040                                                                                                                       |
| F(000)                            | 772                                                                                                                                     |
| Crystal size                      | 0.14 x 0.12 x 0.04 mm                                                                                                                   |
| Theta range for data collection   | 1.60 to 31.51 deg.                                                                                                                      |
| Limiting indices                  | -16 ≤ h ≤ 16, -18 ≤ k ≤ 18, 0 ≤ l ≤ 19                                                                                                  |
| Reflections collected / unique    | 10868 / 10868 [R(int) = 0.0000]                                                                                                         |
| Completeness to theta = 31.51     | 100.0 %                                                                                                                                 |
| Refinement method                 | Full-matrix least-squares on F <sup>2</sup>                                                                                             |
| Data / restraints / parameters    | 10868 / 162 / 443                                                                                                                       |
| Goodness-of-fit on F <sup>2</sup> | 1.076                                                                                                                                   |
| Final R indices [I > 2σ(I)]       | R <sub>1</sub> = 0.0454, wR <sub>2</sub> = 0.1353                                                                                       |
| R indices (all data)              | R <sub>1</sub> = 0.0552, wR <sub>2</sub> = 0.1437                                                                                       |
| Largest diff. peak and hole       | 1.140 and -1.536 e.Å <sup>-3</sup>                                                                                                      |

**Table S5** : Crystal data of complex [4]<sup>+</sup>(PF<sub>6</sub>)

Crystals obtained after diffusion of diethyloxide in a solution of the complex in acetonitrile.

|                                   |                                                                                                                         |
|-----------------------------------|-------------------------------------------------------------------------------------------------------------------------|
| Empirical formula                 | C <sub>27</sub> H <sub>27</sub> Cl <sub>2</sub> N <sub>5</sub> Ru, F <sub>6</sub> P                                     |
| Formula weight                    | 738.48                                                                                                                  |
| Temperature                       | 298 (2) K                                                                                                               |
| Wavelength                        | 0.71073 Å                                                                                                               |
| Crystal system, space group       | monoclinic, C 2/c                                                                                                       |
| Unit cell dimensions              | a = 8.5133(9) Å    alpha = 90 deg.<br>b = 39.637(4) Å    beta = 106.784(3) deg.<br>c = 10.0803(11) Å    gamma = 90 deg. |
| Volume                            | 3256.6(6) Å <sup>3</sup>                                                                                                |
| Z, Calculated density             | 4, 1.506 Mg/m <sup>3</sup>                                                                                              |
| Absorption coefficient            | 0.754 mm <sup>-1</sup>                                                                                                  |
| F(000)                            | 1472                                                                                                                    |
| Crystal size                      | 0.22 x 0.20 x 0.18 mm                                                                                                   |
| Theta range for data collection   | 5.11 to 26.37 deg.                                                                                                      |
| Limiting indices                  | -10 ≤ h ≤ 10, -44 ≤ k ≤ 49,<br>-12 ≤ l ≤ 12                                                                             |
| Reflections collected / unique    | 13715 / 3323 [R(int) = 0.0544]                                                                                          |
| Completeness to theta = 26.37     | 99.2 %                                                                                                                  |
| Max. and min. transmission        | 0.7459 and 0.6348                                                                                                       |
| Refinement method                 | Full-matrix least-squares on F <sup>2</sup>                                                                             |
| Data / restraints / parameters    | 3323 / 380 / 310                                                                                                        |
| Goodness-of-fit on F <sup>2</sup> | 1.083                                                                                                                   |
| Final R indices [I > 2σ(I)]       | R <sub>1</sub> = 0.0469, wR <sub>2</sub> = 0.1066                                                                       |
| R indices (all data)              | R <sub>1</sub> = 0.0714, wR <sub>2</sub> = 0.1177                                                                       |
| Largest diff. peak and hole       | 1.002 and -0.556 e.Å <sup>-3</sup>                                                                                      |

**Table S6:** Selected bond lengths and angles of [1c]<sup>+</sup> (PF<sub>6</sub>) and of the photoproduct: [4](PF<sub>6</sub>)

| Selected bonds (Å)              | [4] <sup>+</sup> | [1c] <sup>+</sup> |
|---------------------------------|------------------|-------------------|
| <b>Ru-N(1)</b>                  | 2.074(4)         | 1.836(8)          |
| <b>Ru-N(2)</b>                  | 2.072(3)         | 2.075(7)          |
| <b>Ru-N(3)</b>                  | 1.942(6)         | 1.964(6)          |
| <b>Ru-N(2)<sub>i</sub></b>      | 2.072(3)         | 2.090(7)          |
| <b>Ru-Cl(1)</b>                 | 2.3444(9)        | 2.319(2)          |
| <b>Ru-Cl(2)</b>                 | 2.3444(9)        | 2.403(2)          |
| <b>N(1)-O(1)</b>                |                  | 1.055(10)         |
| <b>N(5)-C(19)</b>               | 1.359(9)         | 1.384(12)         |
| Selected angles (°)             |                  |                   |
| <b>C(1)-N(1)-Ru(1)</b>          | 180.00(1)        |                   |
| <b>O(1)-N(1)-Ru(1)</b>          |                  | 163.7(9)          |
| <b>N(3)-Ru(1)-N(2)</b>          | 80.07(8)         | 79.2(3)           |
| <b>N(2)-Ru(1)-N(1)</b>          | 99.93(8)         | 94.8(3)           |
| <b>C7-C8-C9 and C17-C16-C21</b> | 10.51(45)        | 19.42(63)         |
